# Supplementary material
Source: publisher site journal article supplement (https://en-cdn.bio-protocol.org/attached/file/20190709/3309%20Supplementary%20Information.docx)
Supplement: Supplementary file 1 [file 3309%20Supplementary%20Information.docx]

**Supplementary Information**

**Lipid-Exchange Rate Assay for Lipid Droplet Fusion in Live Cells**

Jia Wang1, Boon Tin Chua2, Peng Li1 and Feng-Jung Chen2, 3, 4, *

1State Key Laboratory of Membrane Biology and Tsinghua-Peking Center for Life Sciences, Beijing Advanced Innovation Center for Structural Biology, School of Life Sciences, Tsinghua University, Beijing 100084, China; 2Institute of Metabolism and Integrative Biology, Fudan University, Shanghai 200438, China; 3Human Phenome Institute, Fudan University, Shanghai 201203, China; 4Zhongshan Hospital, Fudan University, Shanghai, 200032, China

*For correspondence: [derrick_chen@fudan.edu.cn](mailto:derrick_chen@fudan.edu.cn)

**Theory**

**Biophysical Modeling for Lipid-Exchange Rate Assay**

Refer to Fick’s first law, we write down a steady-state diffusion equation, which indicates the diffusion flux of the fluorescence dye-labeled lipids *J*(*x*) (unit: mol/m2·s) between the lipid droplet 1 (LD1) and lipid droplet 2 (LD2) of a LD pair due to a steady-state concentration gradient of fluorescence dye-labeled lipids *əC* (*x*) = *C*(*x+əx*)－*C*(*x*) = *C*2－*C*1 (unit: mol/m3) between the two LDs:

,(1)

in which *əx* = Δ*l* (unit: m) is the channel length connecting the two LDs, and *D* (unit: m2/s) is the diffusion coefficient of the fluorescence dye-labeled lipids and is assumed to be a constant at any position within the core of a whole LD. Next, Fick’s second law give a time-dependent diffusion equation:

.(2)

In addition, based on the conservation of the total lipids in the LD pair that states the fact that the increased number of lipids in LD1 is equal to the decreased number of lipids in LD2, we write down an equation:

, (3)

in which *N*1 and *N*2 (unit: mol) are the number of fluorescence dye-labeled lipids within LD1 and LD2, respectively. Therefore, the total number of fluorescence dye-labeled lipids is constant at any time and as follows:

,(4)

in which *V*1 and *V*2 (unit: m3) are the volume of LD1 and LD2,and *C*1,0 and *C*2,0 are the initial concentration of fluorescence dye-labeled lipids within LD1 and LD2, at the beginning of the diffusion measurement, respectively.

According to the equation (2) derived from the Fick’s second law, the increased number of fluorescence dye-labeled lipids within LD2, which is equal to the product of a concentration change *dC*2 and the unchanged LD2 volume *V*2, results from the diffusion flux of lipids from LD1 across a cross-sectional area *A* (unit: m2) to LD2 during a time interval *dt.*

. (5)

Therefore, by combining with equations (1) and (5), we could get the following equation:

. (6)

Next, we set a boundary condition of having a concentration difference *C*2(*t*)－*C*1(*t*) across the channel length Δ*l* connecting the two LDs. The equation (6) could be rewritten as:

,(7)

Thus,

(8)

and

.(9)

Combined with equations (4) and (8), we get the following equation

.(10)

Transform all concentrations of fluorescence dye-labeled lipids *C*(*t*) in the equation (10) as equivalent to the fluorescent intensity of fluorescence dye-labeled lipids *I*(*t*), we could deduce the equation:

, (11)

in which we define two parameters and ,

and *Φ*e (unit: μm3/s) is defined as an exchange rate. Thus, the solution of the differential equation (11) can be derived and simplified as:

. (12)

Substitute a boundary condition of the initial fluorescent intensity in LD2, namely *I*2,0, at time *t* = 0 s in equation (12), we get:

. (13)

Reorganize equation (13) to obtain a constant term *c* equal to:

.(14)

Therefore, we deduce the function fluorescent intensityof time in LD2 as:

. (15)

In the same way, combined with equations (4) and (9), the function fluorescent intensity of time in LD1 is:

. (16)

The above two equations (15) and (16) are normalized by division of the intensity of LD1 , which gives rise to the initial intensity ratio of 1 for the LD1 and the ratio of fluorescent intensity of LD2 to at time 0 s as . In addition, the time-dependent ratios of the fluorescent intensities of LD1 and LD2 to are denoted as and , respectively. Thus we get the two normalized equations as follows:

, (17)

in which , , and .

To combine the above two equations (17), we deduce a useful equation as:

.(18)

Finally, the equation (18) can be rewritten as a linear function of time:

.(19)

Using the equation (19), we are able to measure the time-invariant exchange rate *Φe* from a fluorescence recovery after photobleaching measurement.
